# Supplementary material for: CHA2DS2-VASc score, left atrial size and atrial fibrillation as stroke risk factors in the Tromsø Study
Source: PubMed Central journal article supplement — Open Heart. 2016 Sep 6;3(2):e000439. doi: 10.1136/openhrt-2016-000439 (PMC5013428; doi:10.1136/openhrt-2016-000439), 2016-09-06
Supplement: openhrt-2016-000439supp_tables.pdf [file openhrt-2016-000439supp_tables.pdf]

## ONLINE SUPPLEMENT

### CHA<sub>2</sub>DS<sub>2</sub>-VASc score, left atrial size and atrial fibrillation as stroke risk factors in the Tromsø Study

Sweta Tiwari, MPH<sup>1</sup>, Maja-Lisa Løchen PhD<sup>1</sup>, Bjarne K. Jacobsen, PhD<sup>1</sup>, Laila A. Hopstock, RN CRNA, MScN, PhD<sup>1,2</sup>, Audhild Nytnes, MD<sup>1</sup>, Inger Njølstad, MD, PhD<sup>1</sup>, Ellisiv B. Mathiesen, MD, PhD<sup>3,4</sup>, Henrik Schirmer, MD, PhD<sup>3,5</sup>

<sup>1</sup>Department of Community Medicine, UiT The Arctic University of Norway, Tromsø, Norway

<sup>2</sup>Department of Health and Care Sciences, UiT The Arctic University of Norway, Tromsø, Norway

<sup>3</sup>Department of Clinical Medicine, UiT The Arctic University of Norway, Tromsø, Norway

<sup>4</sup>Department of Neurology and Neurophysiology, The University Hospital of North Norway, Tromsø, Norway

<sup>5</sup>Division of Cardiothoracic and Respiratory Medicine, Department of Cardiology, University Hospital of North Norway, Tromsø, Norway

**Corresponding author:** Sweta Tiwari, Department of Community Medicine, UiT The Arctic University of Norway, N-9037 Tromsø, Norway. E-mail: [sweta.tiwari@uit.no](mailto:sweta.tiwari@uit.no). Telephone number: +47 77 64 53 52. Fax number +47 77 64 48 31.

**Key words:** Atrial Fibrillation, Cohort Studies, Risk Factors, Stroke

**Supplemental Table I: Incidence rates of stroke per 1000 person-years according to CHA<sub>2</sub>DS<sub>2</sub>-VASc score and atrial fibrillation (AF) status. The Tromsø Study 1994-2012.**

| CHA <sub>2</sub> DS <sub>2</sub> -VASc score | Women         |                   | Men           |                   |
|----------------------------------------------|---------------|-------------------|---------------|-------------------|
|                                              | AF<br>(n=200) | No AF<br>(n=1231) | AF<br>(n=253) | No AF<br>(n=1160) |
| 0 (n=957)                                    | 3.2           | 2.3               | 1.5           | 2.7               |
| 1 (n=955)                                    | 12.6          | 3.2               | 9.4           | 7.8               |
| 2 (n=435)                                    | 12.9          | 7.3               | 11.8          | 18.7              |
| 3 (n=429)                                    | 13.0          | 11.7              | 14.6          | 22.0              |
| 4 or more (n=68)                             | 26.2          | 32.4              | 28.8          | 104.7             |

**Supplemental Table II: Odds ratio (95% CI) for all stroke according to CHA<sub>2</sub>DS<sub>2</sub>-VASc score, left atrial size and atrial fibrillation in women and men, age adjusted and for total model sex adjusted. The Tromsø Study, 1994-2012.**

|                                                | All subjects<br>(No. of strokes =325) |             | Women<br>(No. of strokes =145) |             | Men<br>(No. of strokes =180) |             |
|------------------------------------------------|---------------------------------------|-------------|--------------------------------|-------------|------------------------------|-------------|
|                                                | OR (95% CI)                           | P for trend | OR (95% CI)                    | P for trend | OR (95% CI)                  | P for trend |
| *CHA <sub>2</sub> DS <sub>2</sub> -VASc score  |                                       |             |                                |             |                              |             |
| 0                                              | 1 (Ref.)                              | <0.0001     | 1 (Ref.)                       | <0.0001     | 1 (Ref.)                     | <0.0001     |
| 1                                              | 2.7 (1.8-3.9)                         |             | 1.8 (0.99-3.3)                 |             | 3.1 (1.9-5.3)                |             |
| 2                                              | 5.6 (3.7-8.3)                         |             | 3.7 (1.9-7.2)                  |             | 6.2 (3.6-10.5)               |             |
| 3                                              | 5.3 (3.6-7.9)                         |             | 5.4 (3.2-9.0)                  |             | 6.3 (3.0-13.1)               |             |
| 4 or more                                      | 14.6 (8.1-26.1)                       |             | 12.8 (6.3-26.0)                |             | 31.0 (9.0-106.8)             |             |
| LA size indexed by BSA<br>(cm/m <sup>2</sup> ) |                                       |             |                                |             |                              |             |
| <2.2                                           | 1 (Ref.)                              | 0.021       | 1 (Ref.)                       | 0.023       | 1 (Ref.)                     | 0.411       |
| 2.2-2.79                                       | 1.1 (0.9-1.5)                         |             | 1.2 (0.8-1.9)                  |             | 1.1 (0.8-1.5)                |             |
| ≥2.8                                           | 2.1 (1.3-3.4)                         |             | 2.1 (1.2-3.9)                  |             | 1.7 (0.7-4.2)                |             |
| +Atrial fibrillation, % (n)                    | 1.1 (0.8-1.4)                         | 0.649       | 1.5 (0.98-2.3)                 | 0.060       | 0.8 (0.5-1.2)                | 0.264       |

\*Not age and sex adjusted

†Atrial fibrillation (AF): any diagnosis of AF before or until up to date of stroke
